# Supplementary material
Source: PubMed Central journal article supplement (PMC4123957)
Supplement: NIHMS582245-supplement-Sequence_Supplemental_Data.pdf [file NIHMS582245-supplement-Sequence_Supplemental_Data.pdf]

>Hvul\_ABCC1

MGSKPLEWYCQPVKDGAWSRAVESAFGAYTPCGIDTLVVCISYLALFCVCFYRIWRRTTKDYKVKRYKIRSPYYNY  
LLGLLVAYCIAEPLYKIVTGTSIMNLDGQSGLAPFEVTSLVIEIAAWCCMLTMILLETKIYITEFRWYIRFVVIYVLVGKA  
AMFNVVLVPRQYYSSSIFLYCSEIICQCIFGILMVVYLPVLDYPGYTPIRSELLVDNTDYEPLPGGEQICPERHA  
NILSRIFFSWMTPLMQQGYKRPITDNDIWKLDDWDETTLYNRFQKYWNDELQKPKPWLLRALHNSLWGRFW  
LGGFFKIGNDASQFVGPTVLSLLESMQKGDPSWNGYTYAFSIFAGVSLGVLAEAQYFQNMRTGFRLRSTLIAAV  
FRKSLRLTNDSTRKFFASGRITNLISTDAESLQQVCQLHSLWSAPFRIVIAMVLLYAQLGPAALIGALMLALLIPIQT  
VIIIGKMQLTKEGLQRTDKRISLMNEILAAMDTVKCYAWEQSFQSKVQDIRDDELSWFRSAQLLAALNSFILNSIP  
VVVTVVSFGVYSLGGELTAAKAFTSLSLFAVLRFPFLMPLNLTQVXXXXXXXXXXXXXXXXXXXXMLGEIPPVSGSD  
TSVVIRGSVAVVPQVSWIFNATVRDNILFGSPFQPPRYGRAIDATALRHDLDLLPVGGDLTEIGERGVNISGGQKQ  
RVSMARAVYSDSDVYLFDDPLSALDAHVGRQVFDKCIKEELRHKTRVLVTNQLHFLPYVDKILLIHDGVVKEEGTF  
DELSNTGEQFKKLMENAGKMEEQTEEKQDESKSQDDTKHTENGAVVIADGAPQKSQDSSSKTKQGKSVLIKQE  
ERETGVVSTKVLSTRYKNAMGGIWAWSVLFVCYALTETLRISSTWLSIWTDEGSLKIHGPGYNNLIYGILSFGQVLVT  
LTNSYWLITSSLRAAKKLHDYMLRSILRAPMVFFHTNPLGRIINRFSKDLGDIDRNLAVFVNMFMFAQISQLLSTFIL  
IGVVSTMSLWAIMPLLLIFYAAYLYYQTTTSREVKRMDSITRSPVYAQFSEALNGLSTIRAYKAYDRMSNINGKSMD  
NNIRFTLVNMSSNRWLAIIRLETGGIMIWFATFAVMQNQRAENQKAFAS TMGLLLTYTLNITNLLTAVLRLASL  
AENSMNAVERVGTIYELPSEAPPVIEDNRPPPWPSSGIIKFEDVVLRYRPELPPVLHGIFIIINGSEKVGIVGRTGA  
GKSSMLNALFRIVELERGRILIDDCDTKKFGIWDLRKVLGIIQPAPVLFSGTIRFNLPFSEHNDADLWEALERAHL  
KDVIRRNALGLDAEVSEAGENFSVGQRQLLSLARALLRRAKILVLDEATAAVDVRTDALIQKTIREEFKSCTMLIIAH  
RLNTVIDCDRLILSSGKISEFDTPENLLSNEDGAFSKMVQSTGPSNAEYKSLVLGNGEERLRKEESKLQDIQRKW  
AASNRWAVAAQFALAASLASSHSDLLSLEVAEGNSILRKTDAVITLQSVLEGKHNTIEESLTEYQVPPDRWWSS  
LYKVIEMATMSKLRNRRQPGYSFENHGSIDWDQI
